# Supplementary material for: A scalable neural network architecture for self-supervised tomographic image reconstruction
Source: Royal Society of Chemistry journal article supplement (doi:10.1039/d2dd00105e), 2023-01-01
Supplement: d2dd00105e1.pdf [file d2dd00105e1.pdf]

## Supporting Information

### A scalable neural network architecture for self-supervised tomographic image reconstruction

Hongyang Dong<sup>1</sup>, Simon D. M. Jacques<sup>2</sup>, Winfried Kockelmann<sup>3</sup>, Stephen W. T. Price<sup>2</sup>, Robert Emberson<sup>4</sup>, Dorota Matras<sup>5,6</sup>, Yaroslav Odarchenko<sup>2</sup>, Vesna Middelkoop<sup>7</sup>, Athanasios Giokaris<sup>2</sup>, Olof Gutowski<sup>8</sup>, Ann-Christin Dippel<sup>8</sup>, Martin von Zimmermann<sup>8</sup>, Andrew M. Beale<sup>1,2,9</sup>, Keith T. Butler<sup>10,11\*</sup>, Antonis Vamvakeros<sup>2\*</sup>

1. Department of Chemistry, University College London, 20 Gordon Street, London WC1H 0AJ, United Kingdom
2. Finden Ltd, Building R71, Rutherford Appleton Laboratory, Harwell, Oxford, OX11 0QX, United Kingdom
3. STFC, Rutherford Appleton Laboratory, ISIS Facility, Harwell, OX11 0QX, United Kingdom
4. Department of Mathematics & Statistics, Lancaster University, Bailrigg, Lancaster, LA1 4YW, United Kingdom
5. Diamond Light Source, Harwell Science and Innovation Campus, Didcot, Oxfordshire OX11 0DE, United Kingdom
6. The Faraday Institution, Quad One, Harwell Science and Innovation Campus, Didcot, OX11 0RA, United Kingdom
7. Flemish Institute for Technological Research (VITO), B-2400 Mol, Belgium.
8. Deutsches Elektronen-Synchrotron DESY, Notkestraße 85, 22607 Hamburg, Germany
9. Research Complex at Harwell, Rutherford Appleton Laboratory, Harwell Science and Innovation Campus, Didcot, Oxon OX11 0FA, United Kingdom
10. SciML, Scientific Computing Department, STFC Rutherford Appleton Laboratory, Harwell Campus, Didcot, OX11 0QX, United Kingdom
11. School of Engineering and Materials Science, Queen Mary University of London, Mile End Rd, Bethnal Green, London E1 4NS, United Kingdom

# Self-supervised learning: SD2I

## SD2I architecture

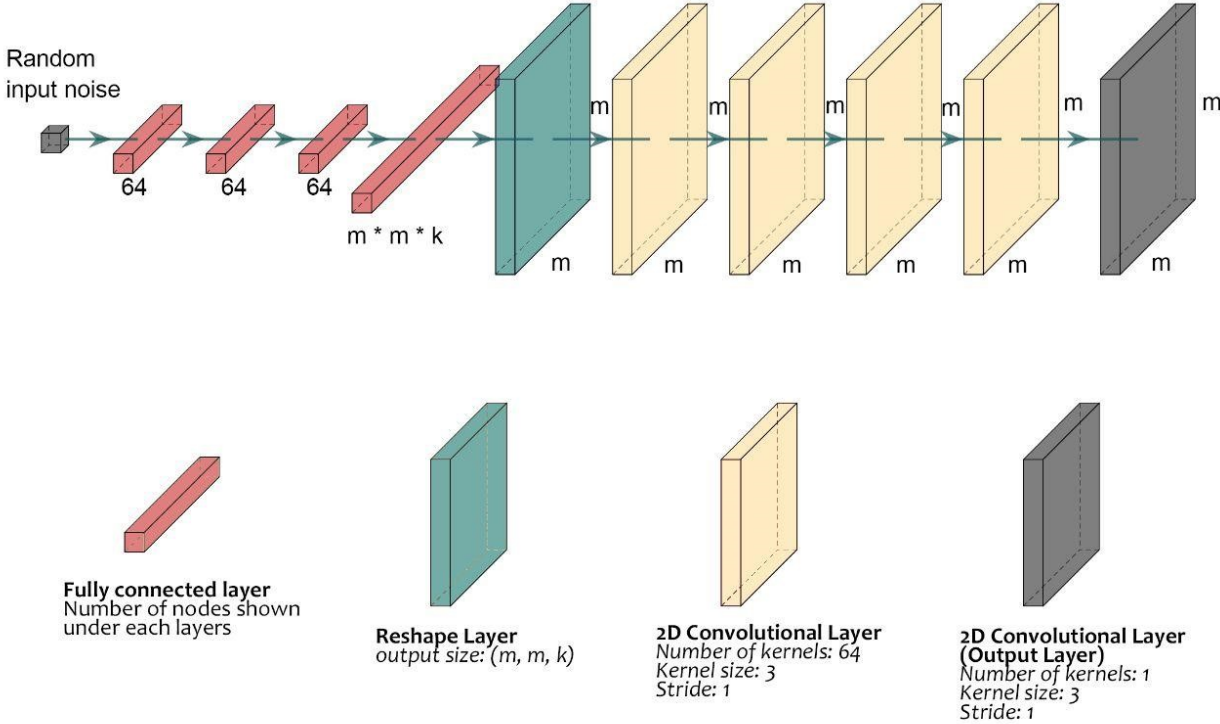

**Figure S1:** A representation of the CNN reconstruction SD2I architecture. The kernel types and parameter settings are shown in the figure. The final fully connected layer size is adjusted by an integer  $k$ , which adjusts the number of kernels used as the input of the following reshape and convolutional layers.

## SD2I: the impact of k factor

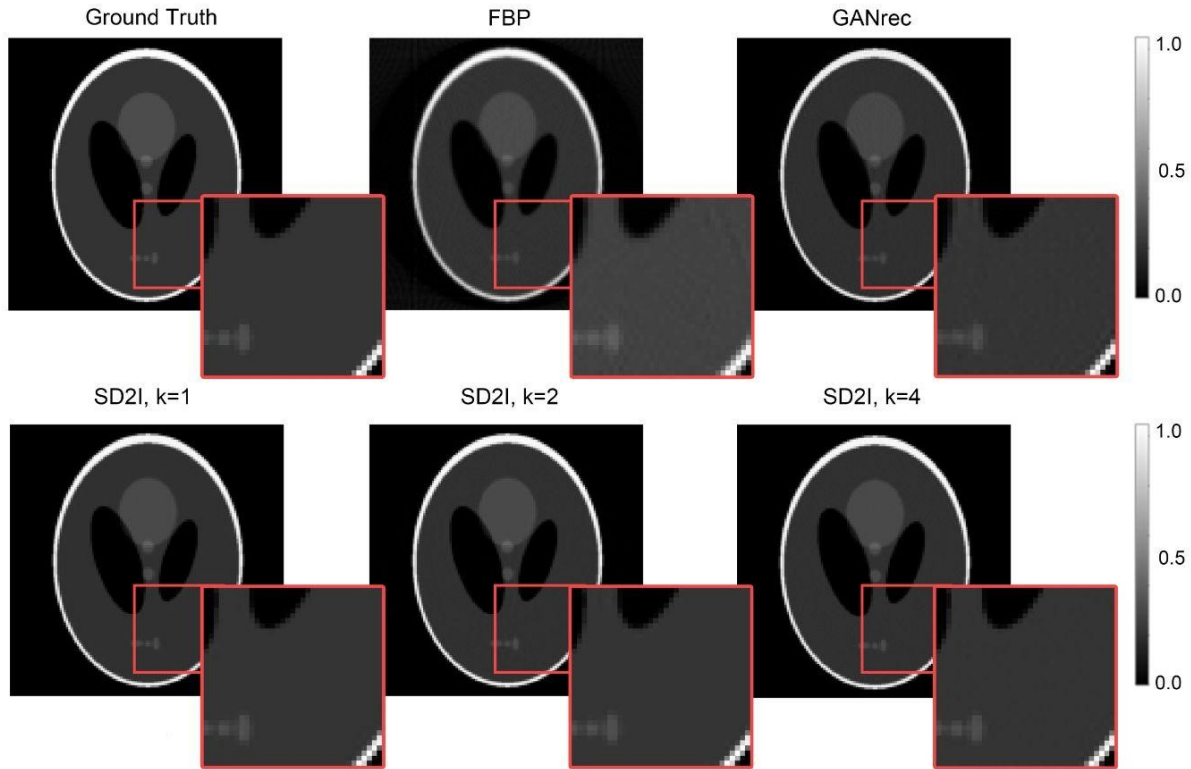

**Figure S2.** TaShepp-Logan, image size: 128x128, sinogram size: 128x200.

**Table S1.** Shepp-Logan, image size: 128x128, sinogram size: 128x200.

|                      | GANrec                   | SD2I - no upsampling (k = 1) | SD2I - no upsampling (k = 2) | SD2I - no upsampling (k = 4) | FBP      |
|----------------------|--------------------------|------------------------------|------------------------------|------------------------------|----------|
| Number of parameters | 8,698,242                | 2,337,154                    | 4,418,947                    | 8,582,533                    | \        |
| MAE                  | 0.00384                  | 0.00168                      | 0.00150                      | 0.00148                      | 0.01088  |
| MSE                  | $5.55772 \times 10^{-5}$ | $1.03833 \times 10^{-5}$     | $1.02758 \times 10^{-5}$     | $0.957322 \times 10^{-5}$    | 0.001000 |
| SSIM                 | 0.9844                   | 0.9913                       | 0.9937                       | 0.9979                       | 0.9599   |
| PSNR                 | 42.55                    | 49.79                        | 49.88                        | 50.19                        | 30.00    |

Architecture: SD2lu

Image size: 256 x 256

Sinogram size: 256 x 64

Number of epochs: 6000  
Loss function: SSIM + MAE  
Start learning rate: 0.0005  
Ground truth type: Clean Shepp-Logan image

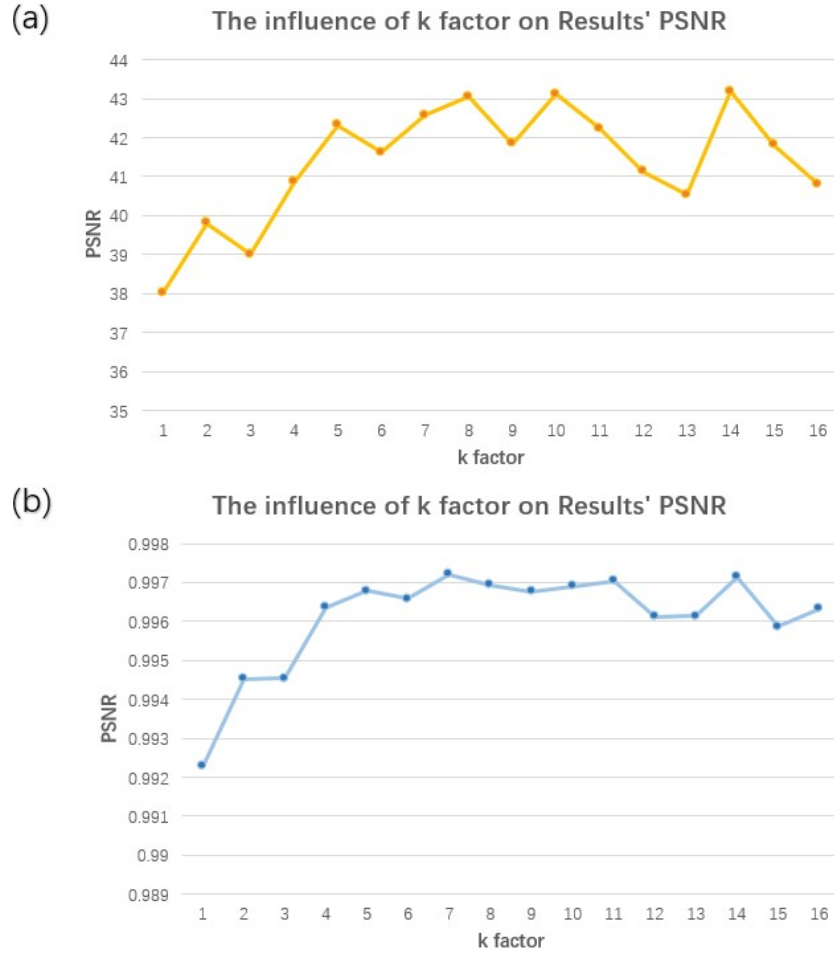

**Figure S3.** The influence of different k factors used in SD2I on the result's (a) PSNR and (b) SSIM. Using larger k factors can improve the quality of reconstructed results on both metrics. In practice, using a k factor between 4 and 8 is more appropriate for achieving a good balance between model size and accuracy.

## SD2I: the impact of loss function

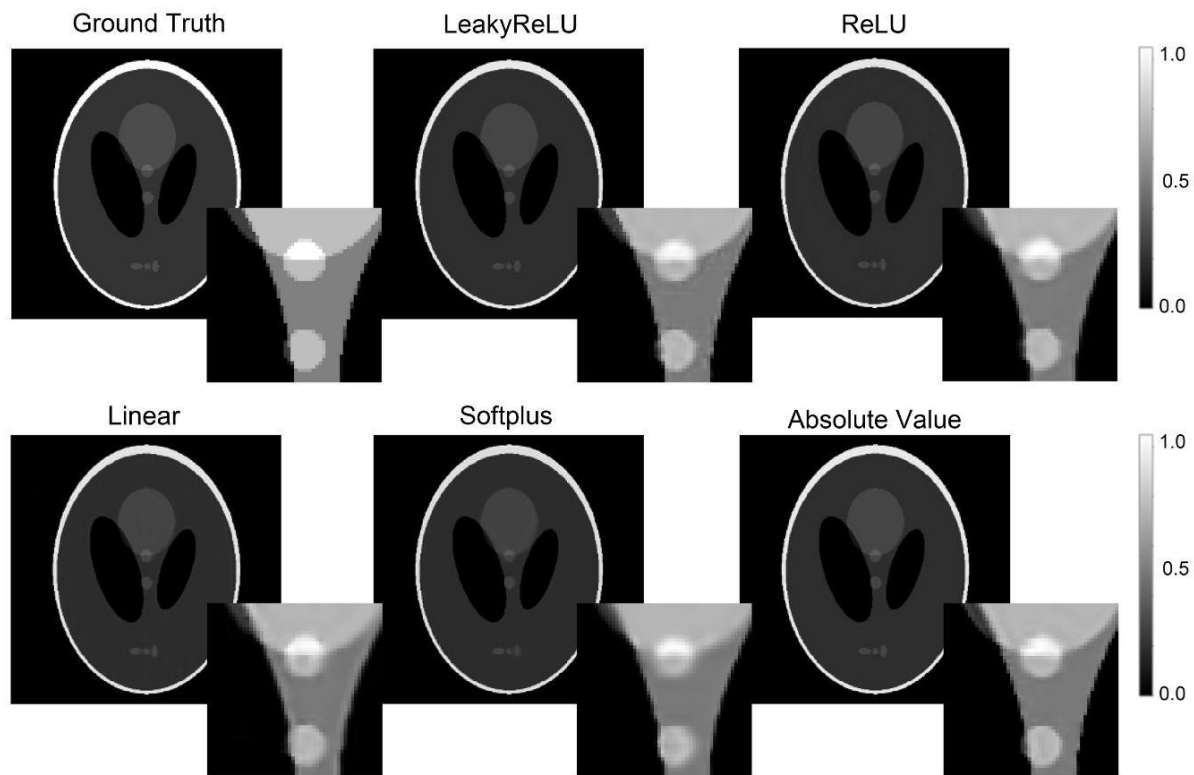

**Figure S4.** Impact of different choice of activation functions on the final layer on the Shepp-Logan phantom image with image size 256x256, sinogram size: 256x64.

**Table S2.** Metrics on the impact of different choice of activation functions.

|      | LeakyReLU              | ReLU                   | Linear                 | Softplus               | Absolute Value         |
|------|------------------------|------------------------|------------------------|------------------------|------------------------|
| MAE  | 0.002774               | 0.002715               | 0.003756               | 0.003533               | 0.002513               |
| MSE  | $1.280 \times 10^{-3}$ | $1.168 \times 10^{-3}$ | $1.900 \times 10^{-3}$ | $1.604 \times 10^{-3}$ | $1.149 \times 10^{-3}$ |
| SSIM | 0.9957                 | 0.9965                 | 0.9920                 | 0.9943                 | 0.9967                 |
| PSNR | 38.93                  | 39.30                  | 37.21                  | 37.95                  | 39.40                  |

## Vector input

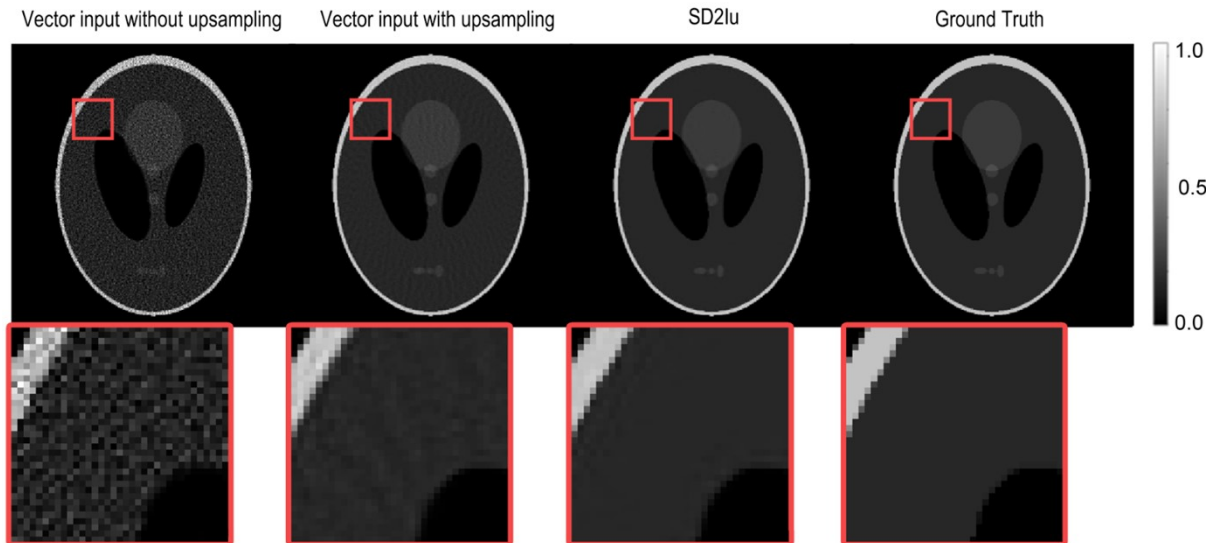

**Figure S5.** The result when using a vector of ones as input. The Vector input without/with upsampling represents the networks that started from the last fully connected layer on the SD2I/SD2lu network respectively. Both networks receive a vector of 64 ones as input which has the same size as the fully connected layer before the last fully connected layer of both SD2I and SD2lu networks. All images are 256x256 large and reconstructed from the 256x64 Shepp-Logan sinogram.

## Pixel learning network

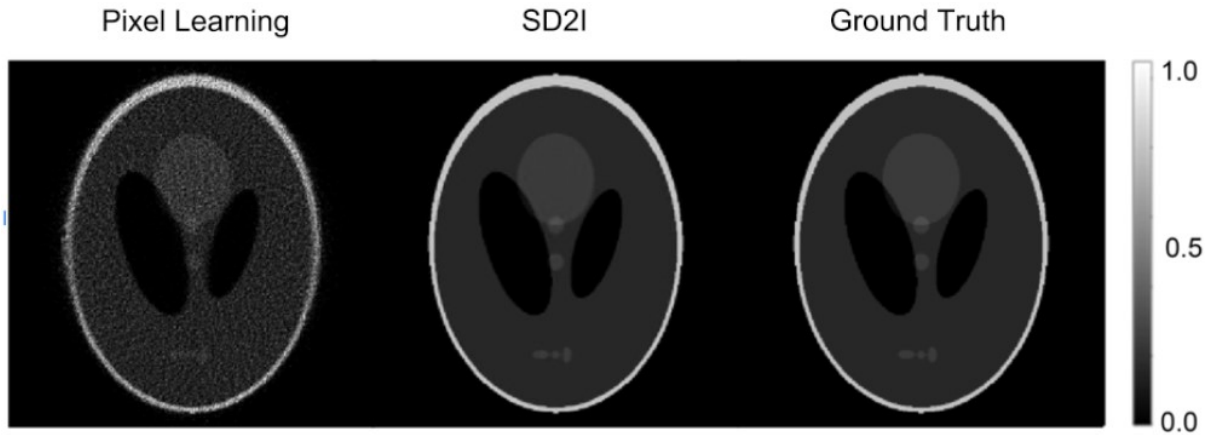

**Figure S6.** The Pixel learning result compared with the SD2I result on the reconstruction of the 256x256 Shepp-Logan image with 400 projections. The pixel learning network only has one large fully connected layer that receives a single digit of one as input.

## SD2I scalability

**Table S3.** Scalability. Number of parameters (nop) per network as a function of image size

| Sinogram/<br>Reconstructed<br>Image size<br>(pixels) | Automap<br>(nop) | GANre<br>c (nop) | SD2I<br>(factor 8)<br>(nop) | SD2I<br>(factor 4)<br>(nop) | SD2lu<br>(factor 8)<br>(nop) | SD2lu<br>(factor 4)<br>(nop) |
|------------------------------------------------------|------------------|------------------|-----------------------------|-----------------------------|------------------------------|------------------------------|
| 64 x 64                                              | 79,356,424       | 2,443,778        | 4,360,585                   | 2,307,973                   | 331,457                      | 262,593                      |
| 128 x 128                                            | 1,304,960,136    | 8,698,242        | 16,909,705                  | 8,582,533                   | 730,817                      | 462,273                      |
| 256 x 256                                            | -                | 33,814,658       | 67,370,377                  | 33,812,869                  | 2,328,257                    | 1,260,993                    |
| 512 x 512                                            | -                | 134,477,442      | 269,741,449                 | 134,998,405                 | 8,718,017                    | 4,455,873                    |
| 1024 x 1024                                          | -                | 537,522,818      | 1,080,282,505               | 540,268,933                 | 34,277,057                   | 17,235,393                   |

## SD2I reconstruction times

**Table S4.** Reconstruction times (time per epoch)

| Sinogram/<br>Reconstructed<br>Image size<br>(pixels) | Automap<br>(s) | GANrec<br>(s) | SD2I<br>(k = 8) (s) | SD2I<br>(k = 4) (s) | SD2lu<br>(k = 8)<br>(s) | SD2lu<br>(k = 4) (s) |
|------------------------------------------------------|----------------|---------------|---------------------|---------------------|-------------------------|----------------------|
| 64 x 64                                              | 0.0131         | 0.0118        | 0.0081              | 0.0079              | 0.0110                  | 0.0092               |
| 128 x 128                                            | 0.1285         | 0.0121        | 0.0103              | 0.0105              | 0.0136                  | 0.0093               |
| 256 x 256                                            | -              | 0.0220        | 0.0206              | 0.0176              | 0.0144                  | 0.0137               |
| 512 x 512                                            | -              | 0.1491        | 0.0940              | 0.0798              | 0.0653                  | 0.06558              |
| 1024 x 1024                                          | -              | 0.5835        | 0.6625              | 0.5962              | 0.5373                  | 0.53529              |

**TableS5.** Reconstruction times for the SD2lu (factor 8).

| Sinogram size<br>(pixels) | Number of<br>parameters | Time per epoch<br>(s) | Number of<br>epochs | Total<br>reconstruction<br>time (s) |
|---------------------------|-------------------------|-----------------------|---------------------|-------------------------------------|
| 64 x 64                   | 331,457                 | 0.0110                | 4000                | 44                                  |
| 128 x 128                 | 730,817                 | 0.0136                | 4000                | 54.4                                |
| 256 x 256                 | 2,328,257               | 0.0144                | 4000                | 57.6                                |
| 512 x 512                 | 8,718,017               | 0.0653                | 4000                | 261.2                               |
| 1024 x 1024               | 34,277,057              | 0.5373                | 4000                | 2149.2                              |

**Table S6.** Impact of sinogram size (number of projections) for the SD2lu (factor 8).

| Sinogram size<br>(pixels) | Number of<br>parameters | Time per epoch (s) | Total reconstruction<br>time (s) |
|---------------------------|-------------------------|--------------------|----------------------------------|
| 512 x 64                  | 4,455,873               | 0.03270            | 130.8                            |
| 512 x 128                 | 4,455,873               | 0.03518            | 140.72                           |
| 512 x 256                 | 4,455,873               | 0.04335            | 173.4                            |



|            |           |         |        |
|------------|-----------|---------|--------|
| 512 x 512  | 4,455,873 | 0.06534 | 261.36 |
| 512 x 1024 | 4,455,873 | 0.12548 | 501.92 |

## Shepp-Logan phantom: SD2I performance

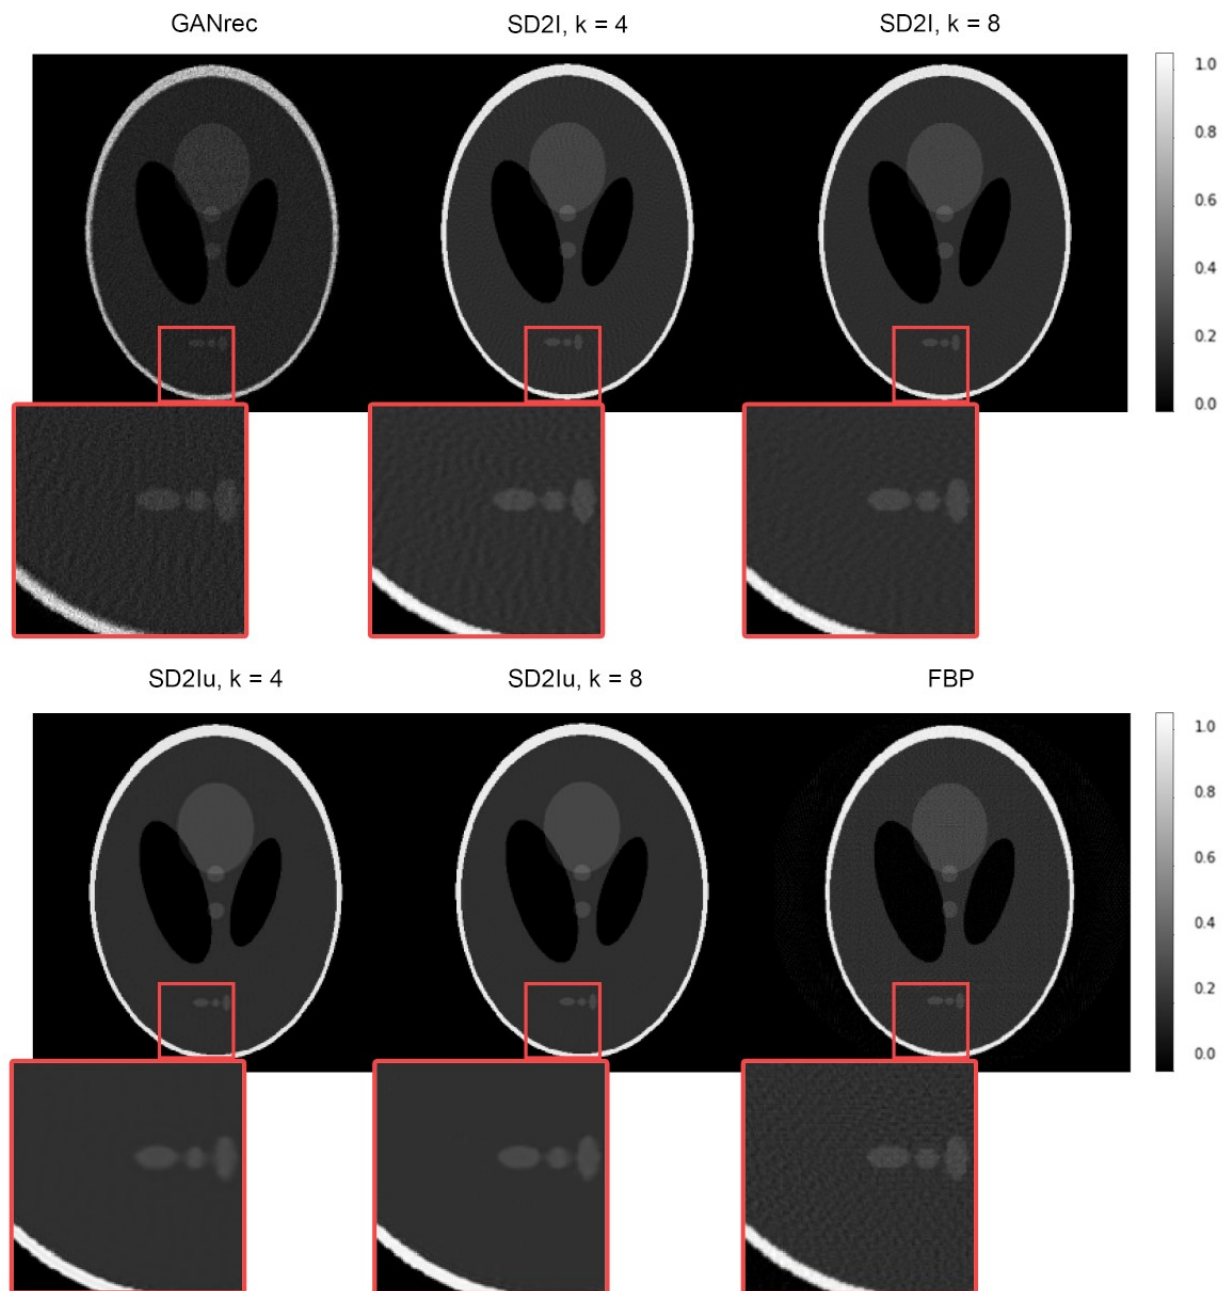

**Figure S7.** Comparison between the SD2I result and conventional reconstruction methods. The image size is 512x512 and reconstructed from the 512x128 Shepp-Logan sinogram.

**Table S7.** Accuracy. Comparison of approaches for a 512x128 Shepp-Logan sinogram

|      | FBP       | GANrec   | SD2I<br>(k = 8)     | SD2I<br>(k = 4)     | SD2lu<br>(k = 8)    | SD2lu<br>(k = 4)    |
|------|-----------|----------|---------------------|---------------------|---------------------|---------------------|
| MAE  | 0.01230   | 0.02712  | 0.002925            | 0.002127            | 0.001315            | 0.001387            |
| MSE  | 0.0005125 | 0.003924 | $4.890 \times 10^5$ | $3.916 \times 10^5$ | $3.645 \times 10^5$ | $3.912 \times 10^5$ |
| SSIM | 0.6855    | 0.6772   | 0.9850              | 0.9895              | 0.9980              | 0.9977              |
| PSNR | 32.90     | 24.06    | 43.10               | 43.95               | 44.38               | 44.08               |

## SD2I loss functions

**Table S8.** Accuracy. Comparison of approaches for a 512x128 Shepp-Logan sinogram with different loss functions.

|      | MSE      | MAE      | MSE + SSIM | MAE +SSIM |
|------|----------|----------|------------|-----------|
| MAE  | 0.00346  | 0.00291  | 0.00337    | 0.00246   |
| MSE  | 0.000241 | 0.000202 | 0.000212   | 0.000116  |
| SSIM | 0.9899   | 0.9937   | 0.9912     | 0.9952    |
| PSNR | 36.1844  | 36.9427  | 36.7385    | 39.3724   |

# SD2I: impact of different ground truth choices on accuracy metrics

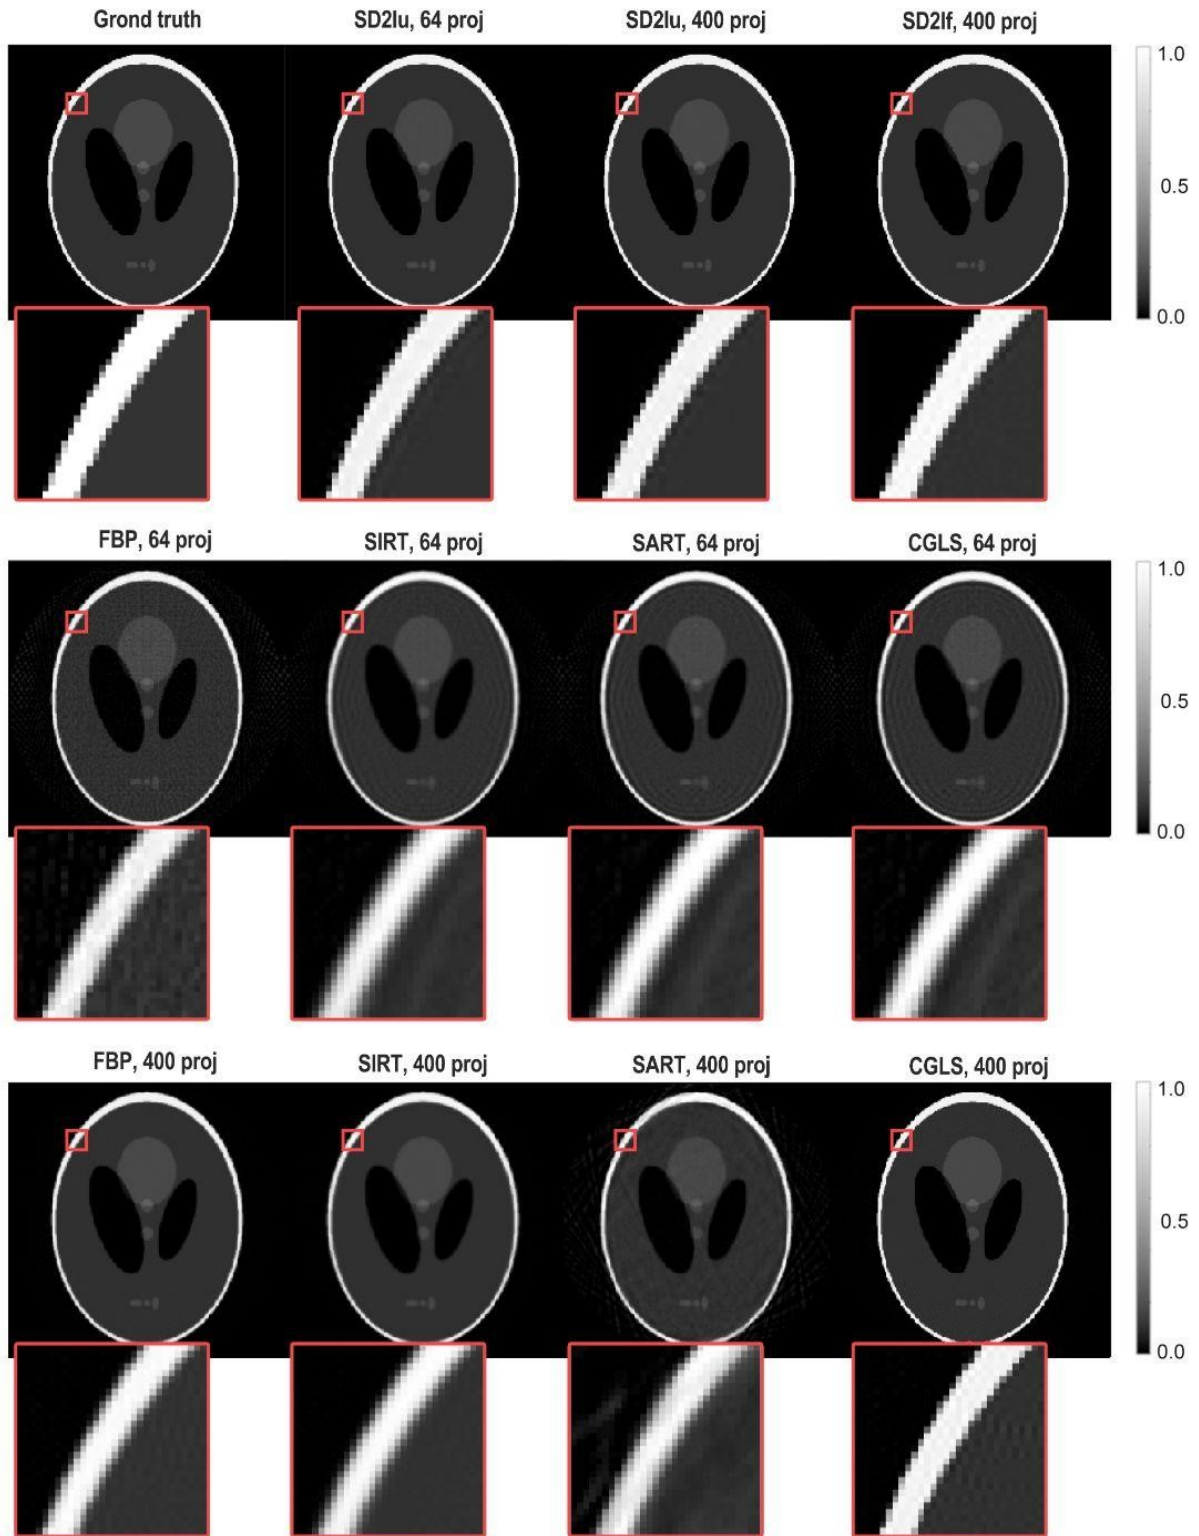

**Figure S8.** Comparison between the SD2I results and conventional reconstruction methods on 256x256 Shepp-Logan images with either 64 or 400 projections. All SD2I-based methods were using  $k = 8$ .

**Table S9.** Accuracy. Comparison of the different reconstruction methods' performance with the reference of the clean Shepp-Logan image.

|                             |       | MAE              | MSE                          | SSIM           | PSNR         |
|-----------------------------|-------|------------------|------------------------------|----------------|--------------|
| Reconstructed from 64 proj  | SD2lu | <b>0.002881</b>  | <b>0.00009763</b>            | <b>0.9931</b>  | <b>40.10</b> |
|                             | FBP   | 0.01906          | 0.001405                     | 0.6129         | 28.52        |
|                             | SART  | 0.01702          | 0.001851                     | 0.7572         | 27.33        |
|                             | CGLS  | 0.01722          | 0.001717                     | 0.7329         | 27.65        |
|                             | SIRT  | 0.01768          | 0.002327                     | 0.7984         | 26.33        |
| Reconstructed from 400 proj | SD2lu | 0.002600         | 5.827x10 <sup>5</sup>        | 0.9950         | 42.35        |
|                             | SD2I  | <b>0.0005762</b> | <b>2.8541x10<sup>6</sup></b> | <b>0.99965</b> | <b>55.44</b> |
|                             | FBP   | 0.007819         | 0.0007783                    | 0.9565         | 31.09        |
|                             | SART  | 0.01505          | 0.0015                       | 0.7907         | 28.24        |
|                             | CGLS  | 0.005191         | 0.0001365                    | 0.9401         | 38.65        |
|                             | SIRT  | 0.01036          | 0.001504                     | 0.9665         | 28.23        |

**Table S10.** Accuracy. Comparison of the different reconstruction methods' performance with the reference of the FBP image reconstructed from 400 projections.

|                             |             | MAE             | MSE              | SSIM          | PSNR         |
|-----------------------------|-------------|-----------------|------------------|---------------|--------------|
| Reconstructed from 64 proj  | SD2lu       | <b>0.007863</b> | 0.0006805        | <b>0.9639</b> | 31.98        |
|                             | FBP         | 0.01448         | 0.0006236        | 0.6776        | 32.36        |
|                             | SIRT        | 0.01214         | 0.0006918        | 0.8692        | 31.90        |
|                             | SART        | 0.01154         | 0.0004871        | 0.8306        | 33.43        |
|                             | CGLS        | 0.01189         | <b>0.0004715</b> | 0.8064        | <b>33.57</b> |
| Reconstructed from 400 proj | SD2lu       | 0.007807        | 0.0007706        | 0.9595        | 31.44        |
|                             | SD2I        | 0.007741        | 0.0007555        | 0.9613        | 31.52        |
|                             | SIRT        | <b>0.005085</b> | <b>0.0002037</b> | <b>0.9828</b> | <b>37.22</b> |
|                             | SART        | 0.01341         | 0.0007248        | 0.8055        | 31.70        |
|                             | CGLS        | 0.007319        | 0.0004429        | 0.9733        | 33.84        |
|                             | Clean image | 0.007819        | 0.0007783        | 0.9585        | 31.39        |

**Table S11.** Accuracy. Comparison of the different reconstruction methods' performance with the reference of the CGLS image reconstructed from 400 projections.

|                            |       | MAE             | MSE              | SSIM          | PSNR         |
|----------------------------|-------|-----------------|------------------|---------------|--------------|
| Reconstructed from 64 proj | SD2lu | <b>0.005695</b> | <b>0.0001475</b> | <b>0.9483</b> | <b>38.88</b> |
|                            | FBP   | 0.01794         | 0.001040         | 0.6807        | 30.40        |

|                                |             |                 |                  |               |              |
|--------------------------------|-------------|-----------------|------------------|---------------|--------------|
|                                | SIRT        | 0.01720         | 0.001855         | 0.8549        | 27.89        |
|                                | SART        | 0.01639         | 0.001409         | 0.8212        | 29.08        |
|                                | CGLS        | 0.01652         | 0.001293         | 0.8009        | 29.45        |
| Reconstructed<br>from 400 proj | SD2lu       | 0.005196        | 0.0001344        | 0.9470        | 39.29        |
|                                | SD2I        | <b>0.005105</b> | <b>0.0001285</b> | <b>0.9492</b> | <b>39.48</b> |
|                                | FBP         | 0.007319        | 0.0004429        | 0.9744        | 34.11        |
|                                | SIRT        | 0.01102         | 0.001093         | 0.9488        | 30.18        |
|                                | SART        | 0.01774         | 0.001572         | 0.7947        | 28.61        |
|                                | Clean image | 0.005191        | 0.0001365        | 0.9462        | 39.22        |

SD2I: More XRD-CT Image

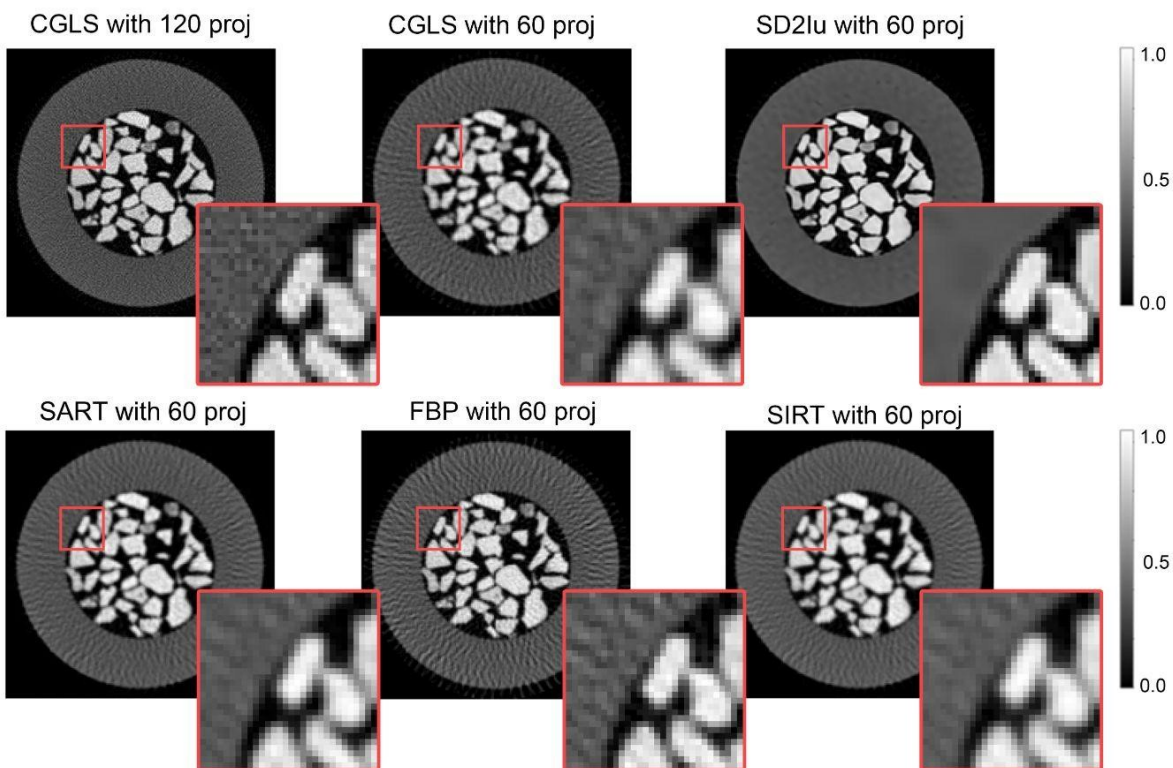

**Figure S9.** OCM catalyst, Image size: 179x179.

**Table S12.** OCM catalyst.

|      | FBP     | SART    | CGLS    | SIRT    | SD2lu          |
|------|---------|---------|---------|---------|----------------|
| MAE  | 0.1479  | 0.1279  | 0.1403  | 0.1291  | <b>0.07403</b> |
| MSE  | 0.04819 | 0.03994 | 0.04601 | 0.04249 | <b>0.01392</b> |
| SSIM | 0.6970  | 0.7854  | 0.7435  | 0.7946  | <b>0.8768</b>  |
| PSNR | 27.23   | 28.05   | 27.43   | 27.78   | <b>32.63</b>   |



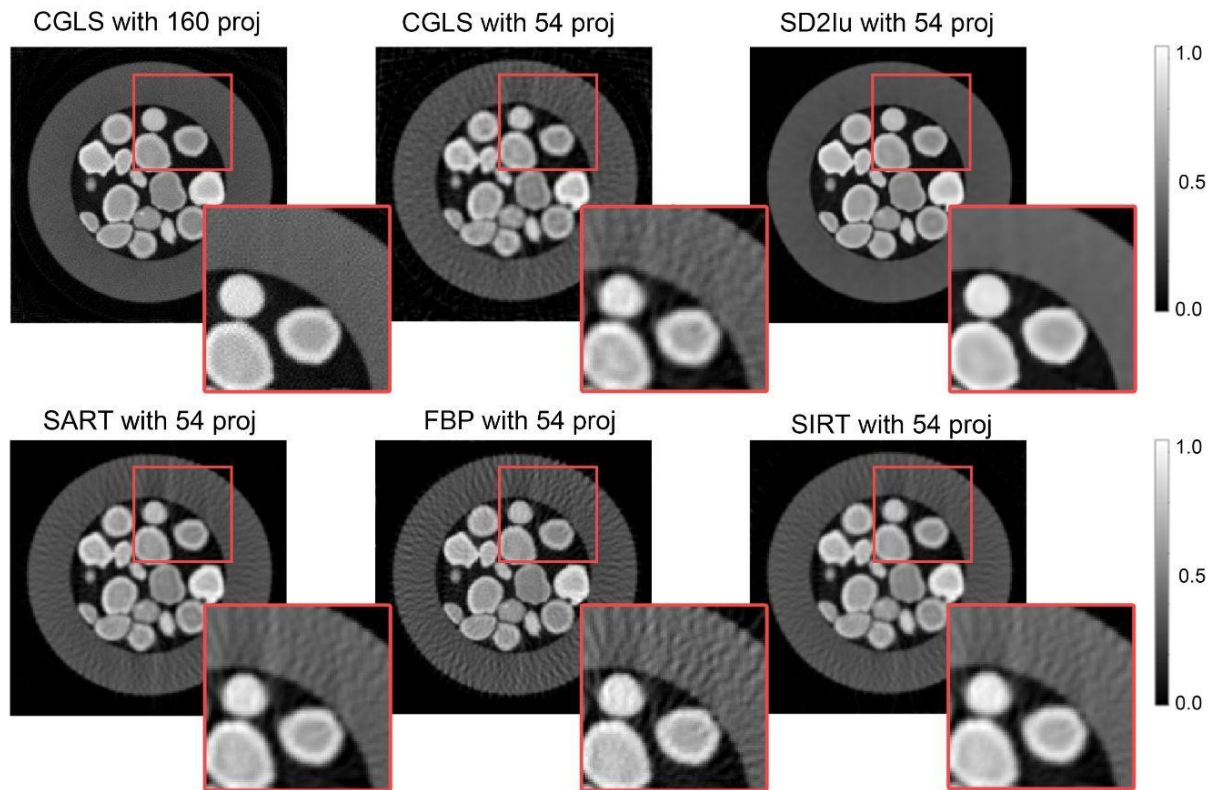

Figure S10. POX, Image size: 223x223.

Table S13. POX, photocatalyst.

|      | FBP     | SART    | CGLS    | SIRT    | SD2lu          |
|------|---------|---------|---------|---------|----------------|
| MAE  | 0.09090 | 0.07544 | 0.8665  | 0.07444 | <b>0.0241</b>  |
| MSE  | 0.2348  | 0.01924 | 0.02338 | 0.01927 | <b>0.00148</b> |
| SSIM | 0.6859  | 0.7993  | 0.7299  | 0.8108  | <b>0.9617</b>  |
| PSNR | 27.01   | 27.88   | 27.22   | 27.87   | <b>39.02</b>   |

Micro-CT images: Positions in radiograph

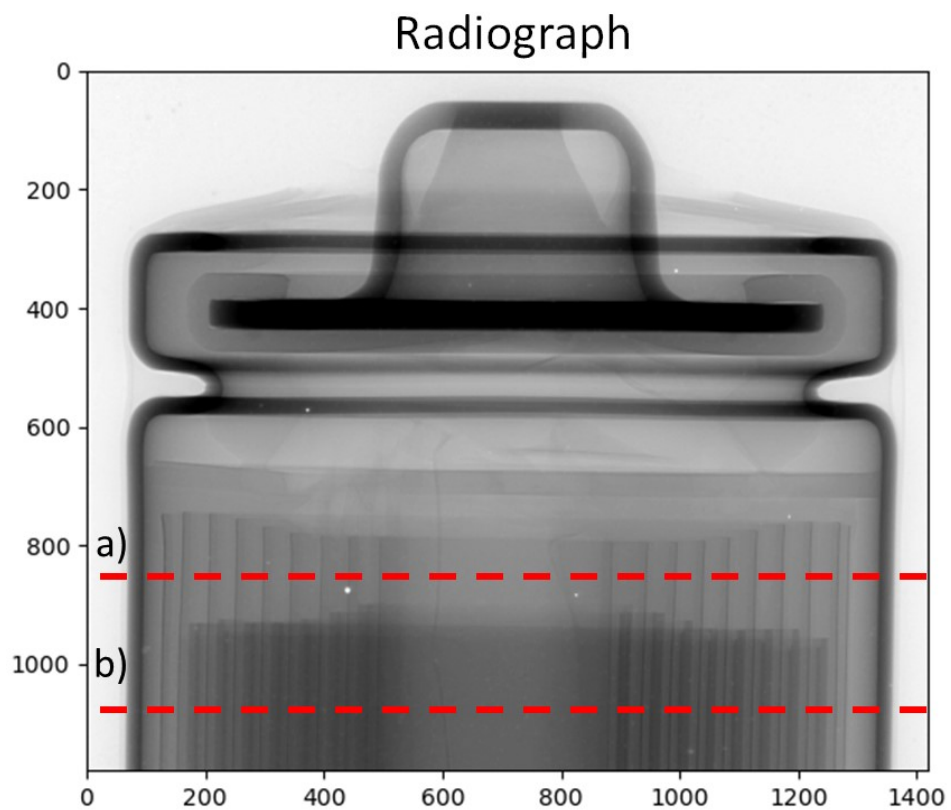

**Figure S11.** Normalised (dark current and flat field corrected) radiograph of the NMC532 Li-ion battery. Positions a) and b) correspond to the two sinograms (battery cross-sections) used in this work.

SD2I: Summary of angular undersampling ratio

**Table S14:** Comparison of ideal and angular undersampled data used in this work.

| Dataset           | No. translation steps | Nyquist No. of projections | Angular undersampling projections |
|-------------------|-----------------------|----------------------------|-----------------------------------|
| Photocatalyst     | 331                   | 520                        | 60 ( <b>11.5%</b> )               |
| NMC532 (xrd-ct)   | 547                   | 859                        | 100 ( <b>11.6%</b> )              |
| NMC532 (micro-ct) | 779                   | 1224                       | 261 ( <b>21.3%</b> )              |
| OCM catalyst      | 179                   | 282                        | 60 ( <b>21.3%</b> )               |
| POX catalyst      | 223                   | 351                        | 54 ( <b>15.4%</b> )               |

## Large micro-CT images: SD2I performance

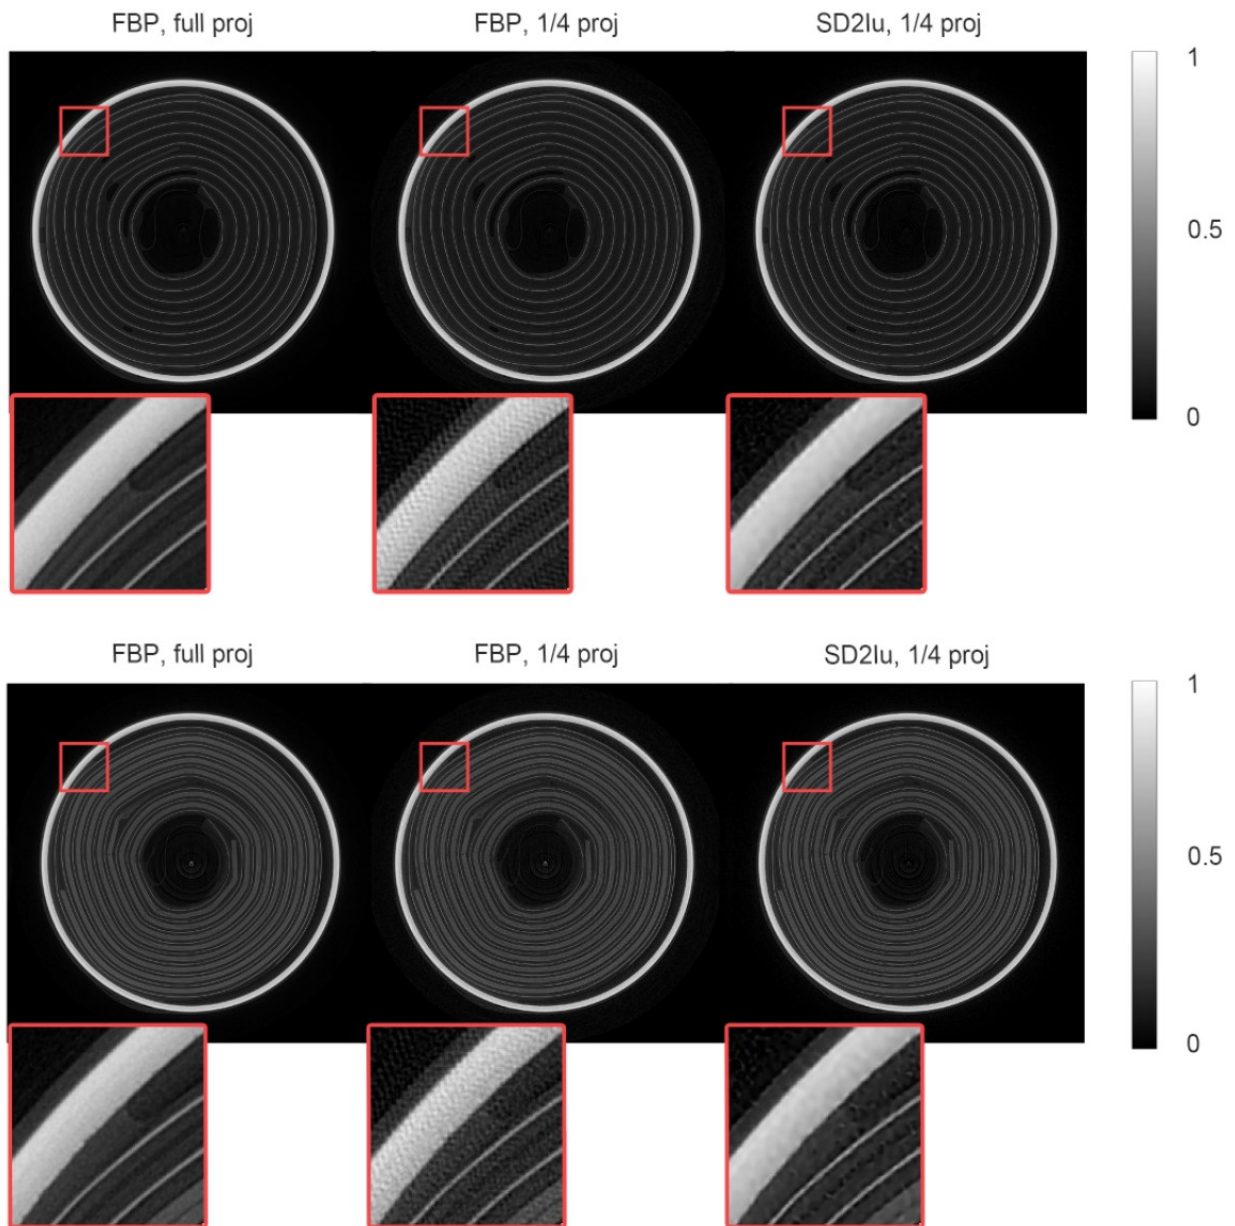

**Figure S12.** Two example micro-CT reconstruction images. SD2I results are using  $k$  factors equal to 8. The image sizes are  $1559 \times 1559$ . The SD2I and FBP results are reconstructed from the sinogram size as  $1559 \times 391$ . The ground truth is obtained by the FBP reconstruction of the  $1559 \times 1561$  sinogram. Each sinogram was acquired after taking the mean of five neighbouring sinograms

**Table S15.** Accuracy. Comparison of approaches for reconstructing two example full-size micro-CT images shown in figure S6 using FBP of the full projection set as the ground truth image.

|      | (a)          |                 | (b)          |                 |
|------|--------------|-----------------|--------------|-----------------|
|      | FBP 1/4 proj | SD2lu           | FBP 1/4 proj | SD2lu           |
| MAE  | 0.01307      | <b>0.00968</b>  | 0.02922      | <b>0.02137</b>  |
| MSE  | 0.000405     | <b>0.000228</b> | 0.001893     | <b>0.001072</b> |
| SSIM | 0.6977       | <b>0.8213</b>   | 0.7063       | <b>0.8210</b>   |
| PSNR | 30.6278      | <b>33.1142</b>  | 29.9556      | <b>32.42354</b> |

SD2l: impact of discriminator

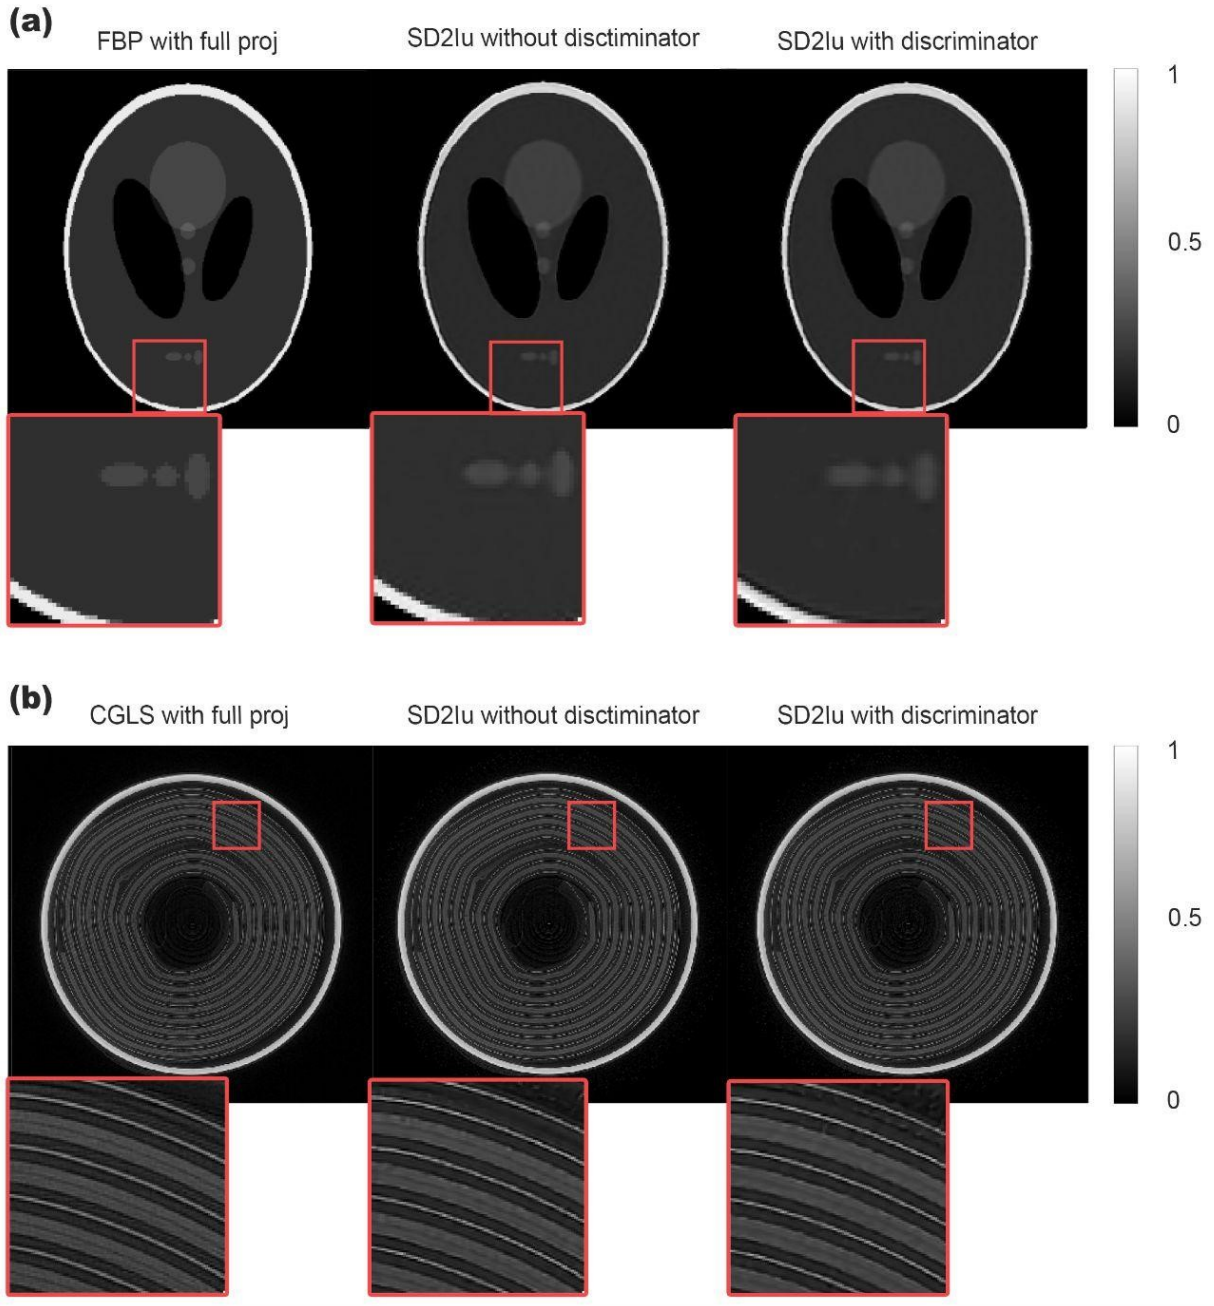

**Figure S13.** The images show the impact of the discriminator in the training loop. (a) The image is reconstructed from a Shepp-Logan simulated sinogram with 256x64 projections as input. (b) The micro-CT experimental image with 779x261 sinogram as input.

**Table S16.** Accuracy. Comparison of the training loop with and without discriminator for both experimental (using CGLS of the full projection set as the ground truth image) and simulated data. The generator architecture is the SD2lu.

|      | (a) Shepp-Logan       |                    | (b) Micro-CT          |                    |
|------|-----------------------|--------------------|-----------------------|--------------------|
|      | Without discriminator | With discriminator | Without discriminator | With discriminator |
| MAE  | <b>0.00315</b>        | 0.00647            | <b>0.03191</b>        | 0.03220            |
| MSE  | <b>0.000125</b>       | 0.000542           | <b>0.002306</b>       | 0.002372           |
| SSIM | <b>0.9941</b>         | 0.9853             | <b>0.7897</b>         | 0.7887             |
| PSNR | <b>39.74</b>          | 33.39              | <b>30.95</b>          | 30.82              |

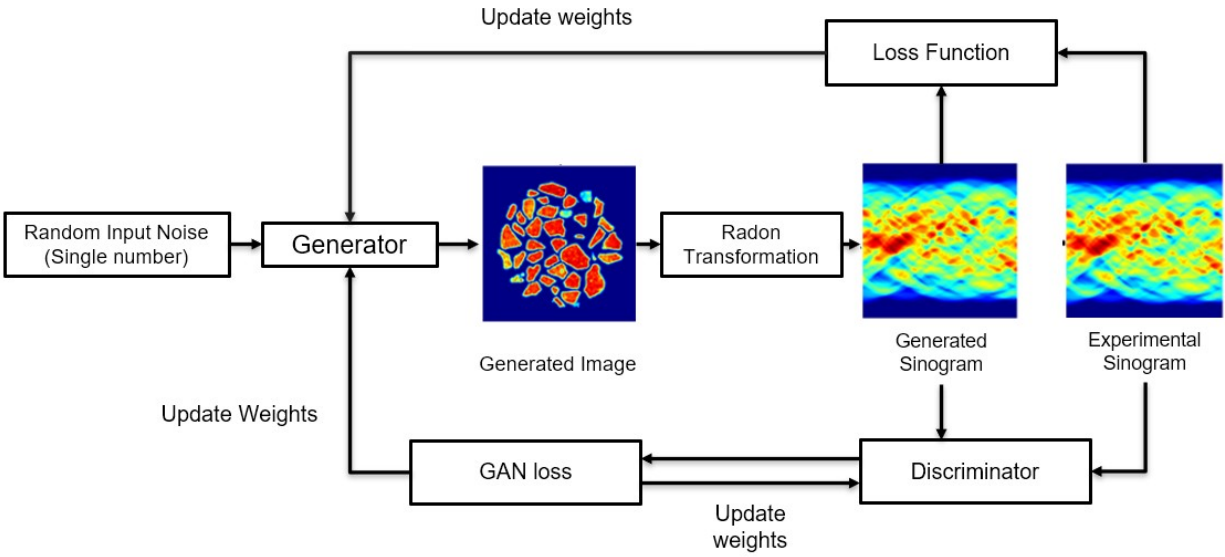

**Figure S14.** The flowchart of the SD2I training algorithm with a discriminator. The input of the SD2I is a random constant which should ideally have a similar order of magnitude as the reconstructed image's signal. The generator creates an image based on the single input. The generated image is converted into a sinogram by the forward operator, and then both the generated sinogram and the original experimental sinogram are sent into the discriminator for calculating the GAN loss. The weights of the generator are then updated by minimising the joint loss function with the GAN loss, MSE and SSIM while the discriminator is updated by the GAN loss only.



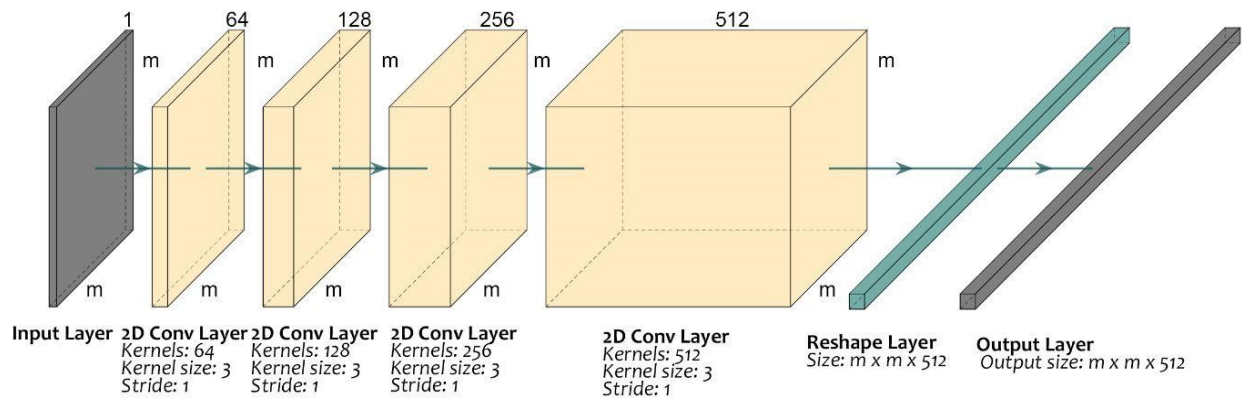

**Figure S15.** A representation of the Discriminator network used in figure S14. The kernel types and parameter settings are shown in the figure. There are no fully connected (dense) layers in the discriminator so the number of parameters is very low compared to the generator networks used in this work.
